# Supplementary material for: First principles study of WSe2 and the effect of V doping on the optical and electronic properties
Source: Royal Society of Chemistry journal article supplement (doi:10.1039/d3ma00940h), 2023-12-19
Supplement: d3ma00940h1.pdf [file d3ma00940h1.pdf]

## First principle study of WSe<sub>2</sub> and the effect of V doping on the optical and electronic properties

Eleonora Pavoni<sup>a</sup>, Elaheh Mohebbi<sup>a</sup>, Gian Marco Zampa<sup>b</sup>, Pierluigi Stipa<sup>a</sup>, Luca Pierantoni<sup>b</sup>, Emiliano Laudadio<sup>a\*</sup>, Davide Mencarelli<sup>b</sup>

Table S1. Bandgap energies calculated by using GGA-PBE and hybrid-HSE06.

| WSe <sub>2</sub>  | Bandgap obtained by GGA-PBE          | Bandgap obtained by hybrid-HSE06    |
|-------------------|--------------------------------------|-------------------------------------|
| Bulk undoped      | 0.94 eV (indirect), 1.58 eV (direct) | 1.62 eV (indirect) 2.26 eV (direct) |
| 1 ML undoped      | 1.68 eV (direct)                     | 2.19 eV (direct)                    |
| 1.4% of V doping  | 0.93 eV                              |                                     |
| 2.8% of V doping  | 0.91 eV                              |                                     |
| 5.6% of V doping  | 0.85 eV                              |                                     |
| 11.2% of V doping | 0.80 eV                              |                                     |

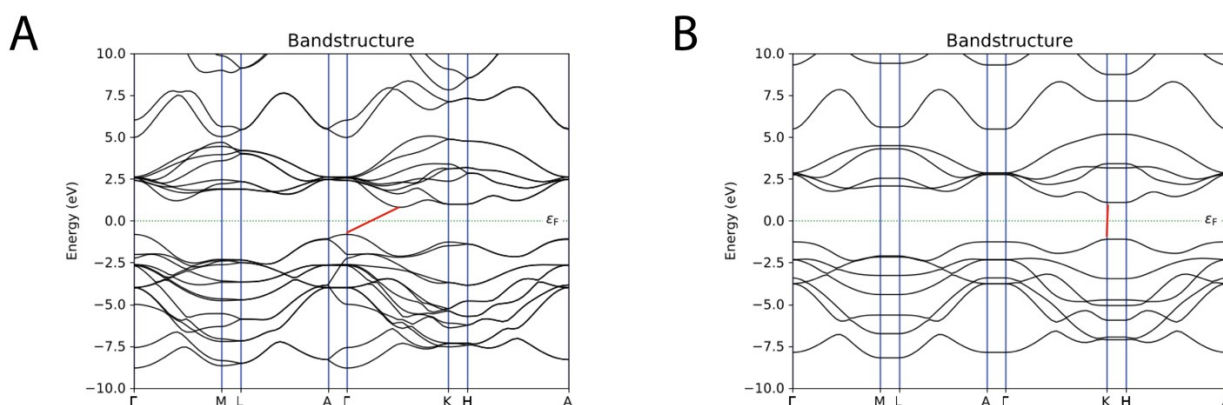

**Fig. S1.** Band structures of WSe<sub>2</sub> as (A) bulk material and as (B) a single layer calculated by using HybridGGA-HSE06 functional. The Fermi level is depicted as a dashed green line and the band gap as a red line.

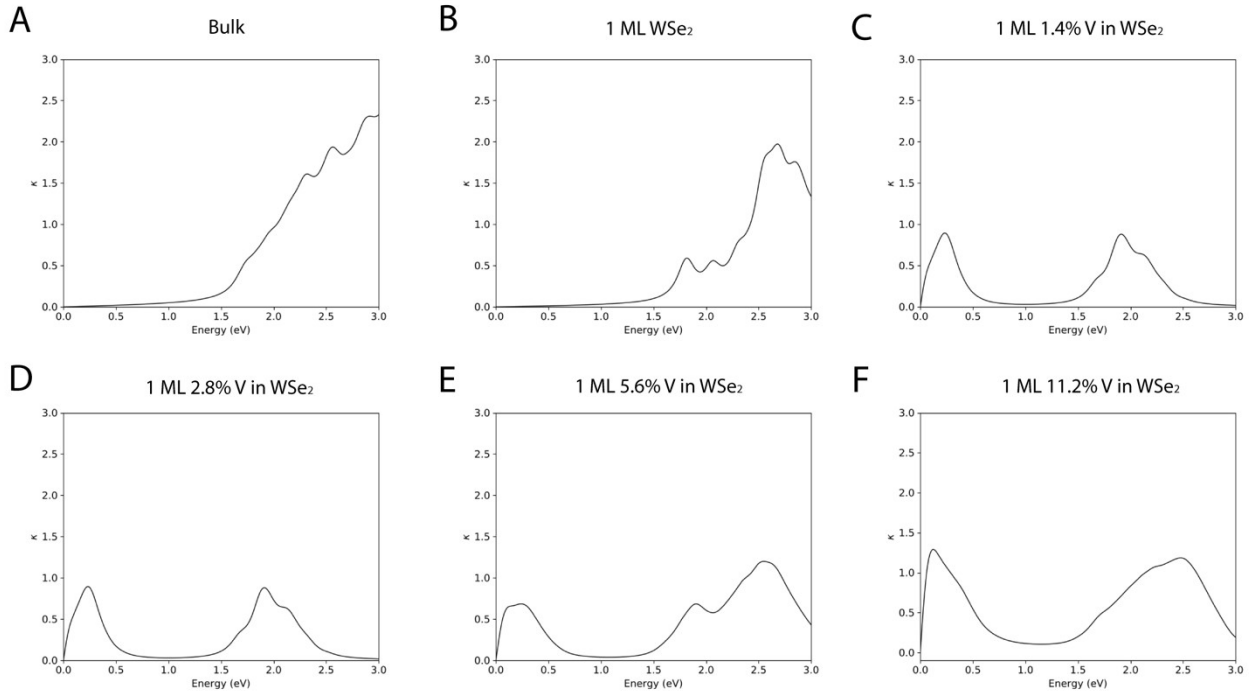

**Fig. S2.** Extinction coefficient spectra of WSe<sub>2</sub> as a bulk (A) and as 1ML (B). The extinction coefficient of WSe<sub>2</sub> doped with different percentages of V: WSe<sub>2</sub>:V 1.4% (C), WSe<sub>2</sub>:V 2.8% (D), WSe<sub>2</sub>:V 5.6% (E), and WSe<sub>2</sub>:V 11.2% (F). The spectra report the extinction coefficient ( $k$ ) as a function of the energy, between 0 to 3 eV.

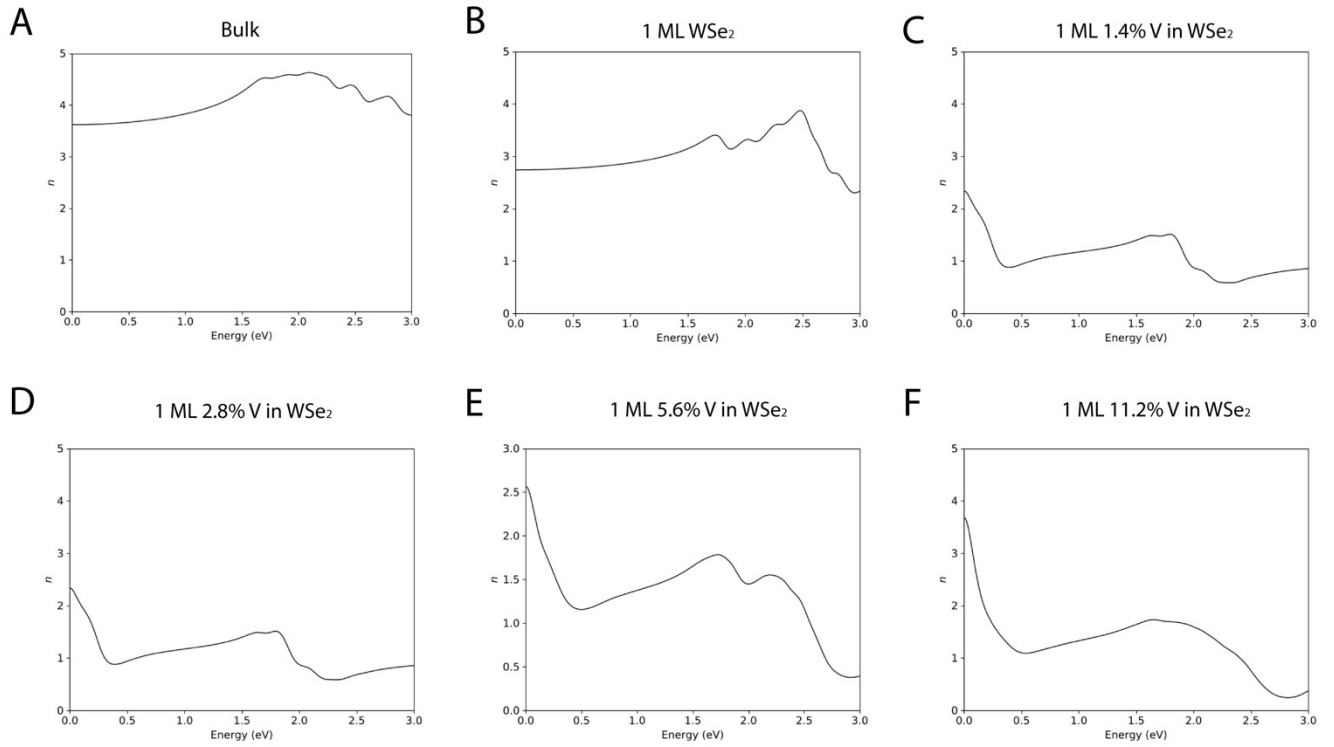

**Fig. S3.** Refractive index spectra of WSe<sub>2</sub> as a bulk (A) and as 1ML (B). Refractive index of WSe<sub>2</sub> doped with different percentages of V: WSe<sub>2</sub>:V 1.4% (C), WSe<sub>2</sub>:V 2.8% (D), WSe<sub>2</sub>:V 5.6% (E), and WSe<sub>2</sub>:V 11.2% (F). The spectra report the refractive index ( $n$ ) as a function of the energy, between 0 to 3 eV.
